# Supplementary material for: Binding pose and affinity prediction in the 2016 D3R Grand Challenge 2 using the Wilma-SIE method
Source: Springer Nature journal article supplement (doi:10.1007/s10822-017-0071-0), 2017-10-05
Supplement: 10822_2017_71_MOESM1_ESM.pdf [file 10822_2017_71_MOESM1_ESM.pdf]

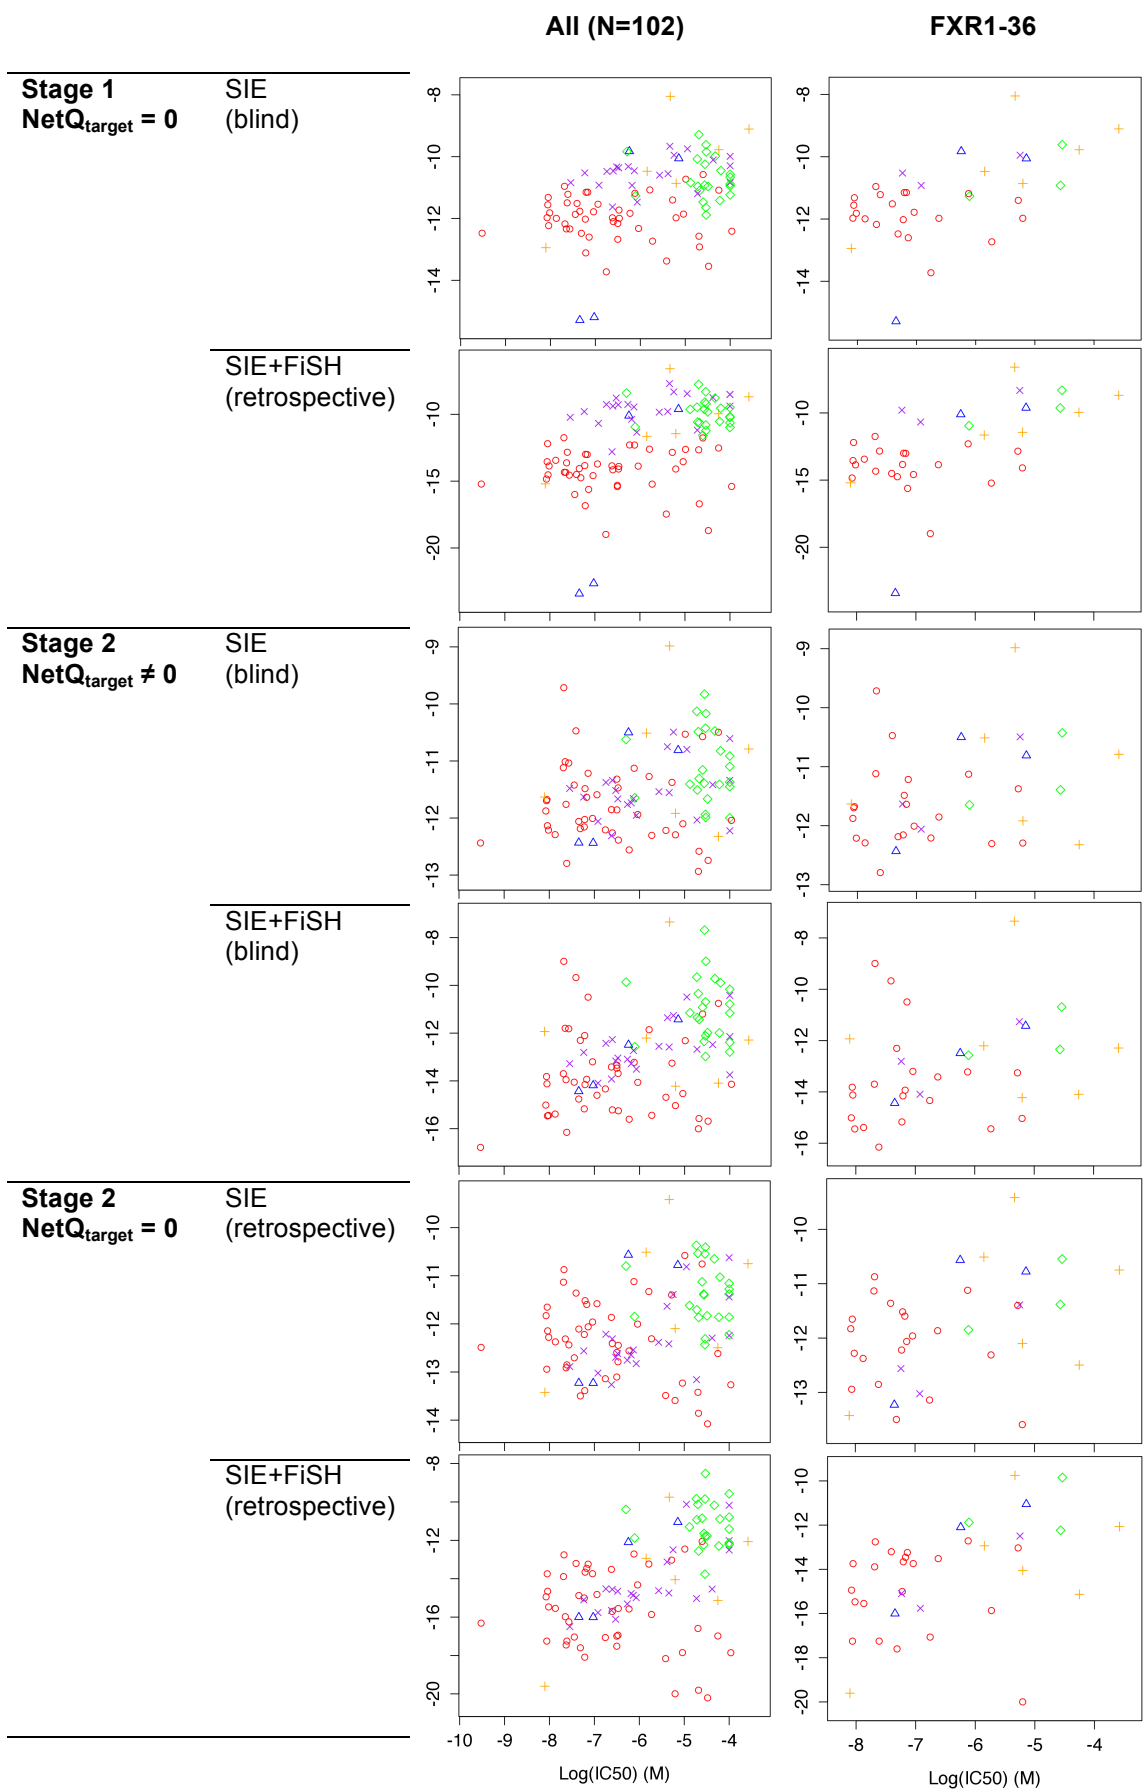

**Figure S1**

**Fig. S1.** Correlation plots for various SIE models for binding affinity ranking. See Table 2 for the corresponding Kendall-tau rank correlation coefficients. Chemical classes are denoted as the following:

○ Benzimidazoles

△ Isoxazoles

+ Others

× Spiros

◇ Sulfonamides
